# Supplementary material for: A gene regulatory network underlying the formation of pre-placodal ectoderm in Xenopus laevis
Source: PubMed Central journal article supplement (PMC6048776; doi:10.1186/s12915-018-0540-5), 2018-07-16

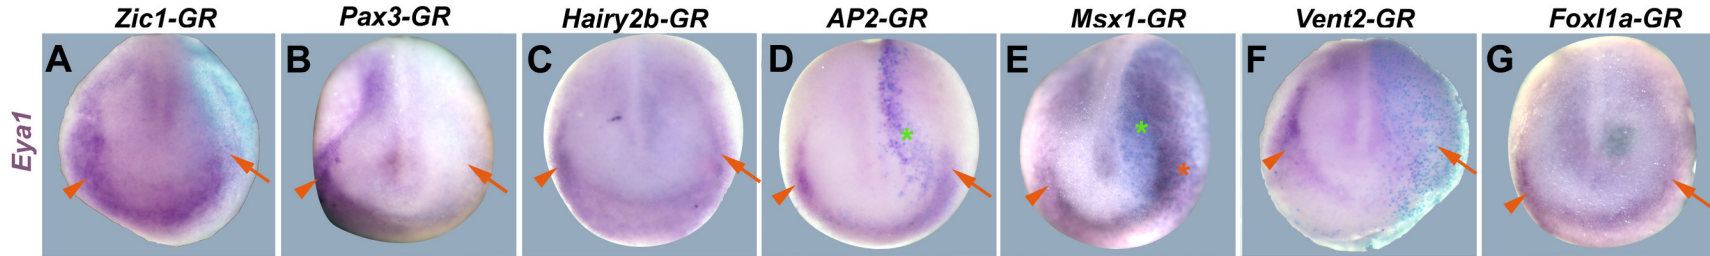

Supplement: 12915_2018_540_MOESM4_ESM.pdf [file 12915_2018_540_MOESM4_ESM.pdf]
