# Supplementary material for: A gene regulatory network underlying the formation of pre-placodal ectoderm in Xenopus laevis
Source: PubMed Central journal article supplement (PMC6048776; doi:10.1186/s12915-018-0540-5), 2018-07-16

**A**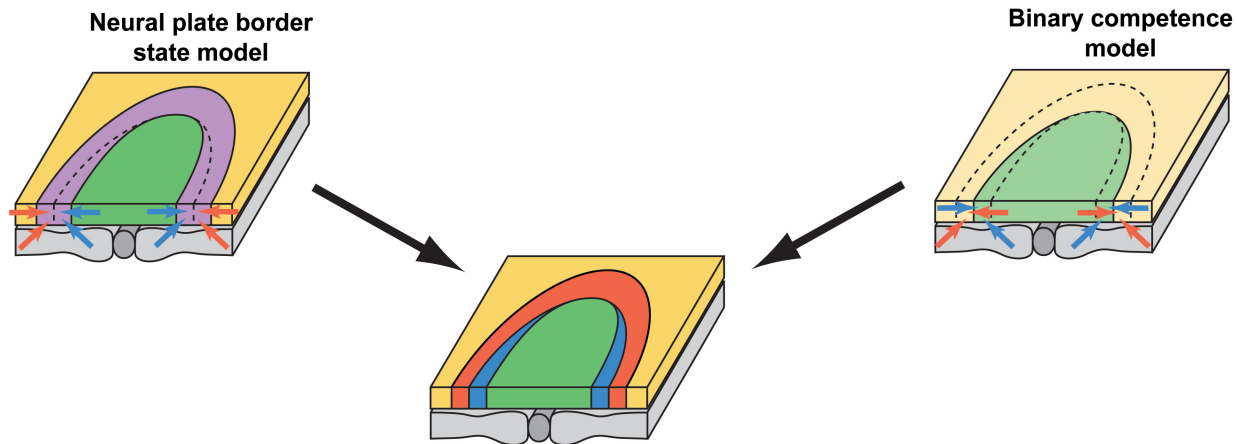**B**

**Non-neural competence territory**  
(Dlx3/5, GATA2/3, Foxl1/3, Msx1, AP2, Vent1/2, ...)

**Neural competence territory**  
(Zic1-5, Geminin, Sox3, ...)

**Epidermis**

**Preplacodal ectoderm (Six1, Six4, Eya...)**

**Neural plate**

**Neural crest (FoxD3, Snail1/2, Twist, Sox9/10, ...)**

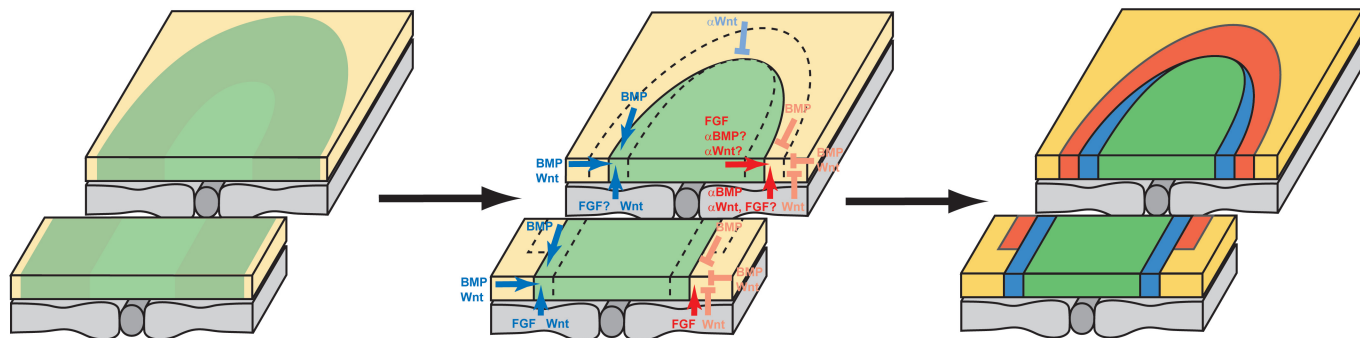

Supplement: 12915_2018_540_MOESM8_ESM.pdf [file 12915_2018_540_MOESM8_ESM.pdf]
